# Supplementary material
Source: publisher site journal article supplement (https://www.dovepress.com/article/232111)
Supplement: Supplementary file 1 [file get_supplementary_file.php]

**Supplementary Data for Manuscript: 232111-MS**

**Evaluation of NP Loaded PHE-Ms Based Tablet (MT1-MT5) (Quality Control Tests)**

| **Formulation**  **Code** | **Thickness**  **(mm)** | **Friability***  **(%)** | **Hardness**  **(kg/cm²)** | **Weight**  **Variation**  **(mg)** | **Content Uniformity**  **(%)** | **Drug**  **Content**  **(%)** | **Moisture Content**  **%(w/w)** |
| --- | --- | --- | --- | --- | --- | --- | --- |
| NP-MT1 | 4.11 ±0.02 | 0.76 | 6.03±0.03 | 655.0±5.82 | 94.5±0.115 | 98.7±4.12 | 0.11±0.03 |
| NP-MT2 | 4.10 ±0.01 | 0.76 | 6.23±0.13 | 657.0±3.11 | 92.3±0.033 | 98.3±6.35 | 013±0.01 |
| NP-MT3 | 4.11±0.05 | 0.77 | 5.94±0.22 | 653.0±5.23 | 94.1±013 | 97.2±2.33 | 0.12±0.01 |
| NP-MT4 | 4.11±0.01 | 0.78 | 5.21±0.43 | 655.0±3.64 | 93.6±0.01 | 96.5±3.19 | 0.15±0.03 |
| NP-MT5 | 4.12±0.02 | 0.78 | 4.41±0.02 | 659±3.52 | 92.3±0.320 | 96.2±2.64 | 0.17±0.05 |

All values were signified as Standard Error Mean (SEM), n=3 except asterik one.

**Abbreviations:** NP**,** Naproxen**;** NP-MT, Naproxen loaded microspheres based tablets

**Stability study of the NP loaded Polymer Hybrid Enteric Microspheres (PHE-Ms) based Tablets of the Optimized Ratio (1:1) at different storage conditions (ICH guidelines)**

| **Conditions** | **Time Interval**  **(Days)** | **Physical**  **Appearance**  **(color)** | **Moisture**  **Contents**  **(%w/w)** | **Hardness (kg/cm²)** | **Friability***  **(%)** | **Assay**  **(active drug)**  **(%)** | **Drug**  **Release**  **(%)** |
| --- | --- | --- | --- | --- | --- | --- | --- |
| Refrigeration  (5±3°C) | 0 | ­­­­ ­­__ __ | 0.11±0.03 | 6.03±0.03 | 0.76 | 98.7±4.12 | 89.5±0.58 |
|  | 30 | __ __ | 0.11±0.01 | 6.03±0.11 | 0.76 | 98.7±3.4 | 89.5±0.58 |
|  | 60 | __ __ | 0.11±0.03 | 6.03±0.15 | 0.76 | 98.7±2.1 | 89.5±0.22 |
|  | 120 | __ __ | 0.11±0.01 | 6.03±0.21 | 0.76 | 98.6±3.1 | 89.4±0.34 |
|  | 180 | __ __ | 0.12±0.01 | 6.01±0.11 | 0.77 | 98.3±1.8 | 89.4 ±0.14 |
| Room temperature  (25±2°C) | 0 | __ __ | 0.11±0.03 | 6.03±0.03 | 0.76 | 98.7±4.12 | 89.5±0.58 |
|  | 30 | __ __ | 0.11±0.02 | 6.03±0.12 | 0.76 | 98.7±1.3 | 89.5±0.11 |
|  | 60 | __ __ | 0.11±0.02 | 6.03 ±0.33 | 0.76 | 98.6±1.1 | 89.5±0.23 |
|  | 120 | __ __ | 0.12±0.01 | 6.03 ±0.15 | 0.76 | 98.4±3.7 | 89.4±0.18 |
|  | 180 | __ __ | 0.13±0.02 | 6.02±0.25 | 0.78 | 98.2±2.1 | 89.1±0.12 |
| Accelerated  (40±2°C/75 ±5%RH) | 0 | __ __ | 0.11±0.03 | 6.03±0.03 | 0.76 | 98.7±4.12 | 89.5±0.58 |
|  | 30 | __ __ | 0.11±0.01 | 6.04±0.11 | 0.76 | 98.5±3.2 | 89.1±0.51 |
|  | 60 | __ __ | 0.11±0.04 | 6.08±0.3 | 0.74 | 98.3±1.1 | 88.7±0.28 |
|  | 120 | __ __ | 0.13±0.03 | 6.12±0.31 | 0.73 | 97.7±3.1 | 88.4±0.15 |
|  | 180 | __ __ | 0.15±0.01 | 6.7±0.12 | 0.71 | 97.1±2.2 | 88.1±0.32 |

(--) Indicate no change, All values were represented in (mean± SD, n=3) except asterik one. **Abbreviations:** NP**,** Naproxen**;** NP-MT, Naproxen loaded microspheres based tablets
